# Supplementary material for: The photocatalytic degradation of chloramphenicol with electrospun Bi2O2CO3-poly(ethylene oxide) nanofibers: the synthesis of crosslinked polymer, degradation kinetics, mechanism and cytotoxicity
Source: PubMed Central journal article supplement — RSC Adv. 2019 Sep 23;9(51):29917–26. doi: 10.1039/c9ra06346c (PMC9072081; doi:10.1039/c9ra06346c), 2019-09-23
Supplement: RA-009-C9RA06346C-s001.pdf [file RA-009-C9RA06346C-s001.pdf]

Supporting information

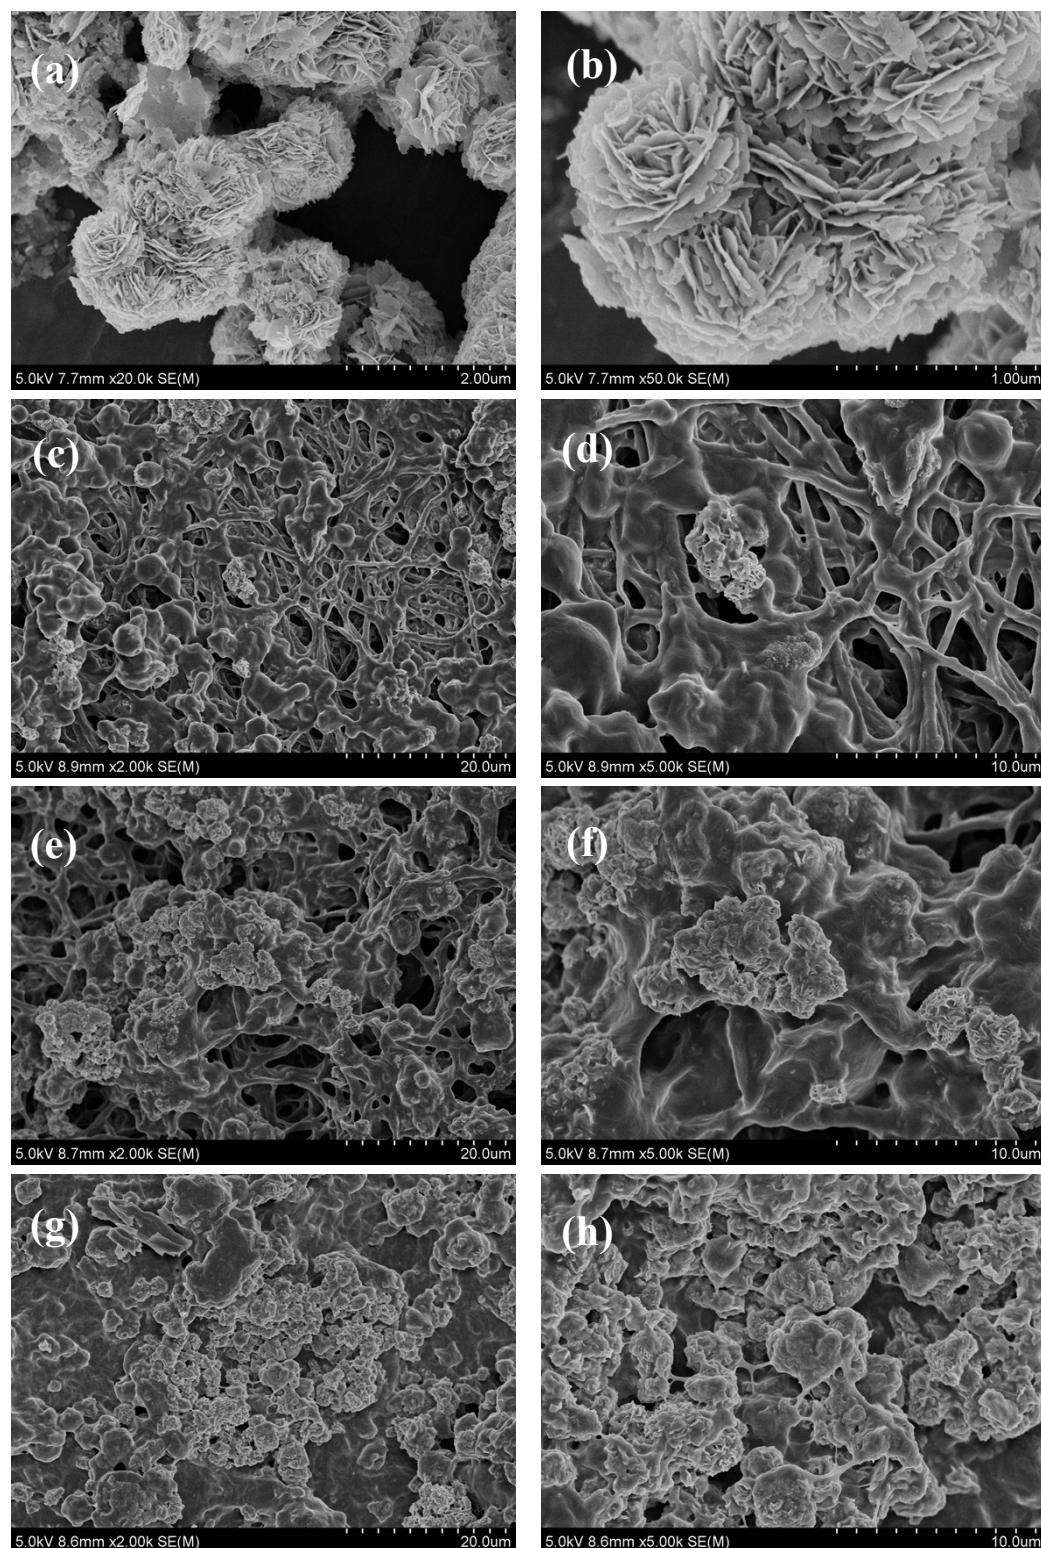

Figure S1. SEM images of  $\text{Bi}_2\text{O}_2\text{CO}_3$ , PPB2, PPB6 and PPB8

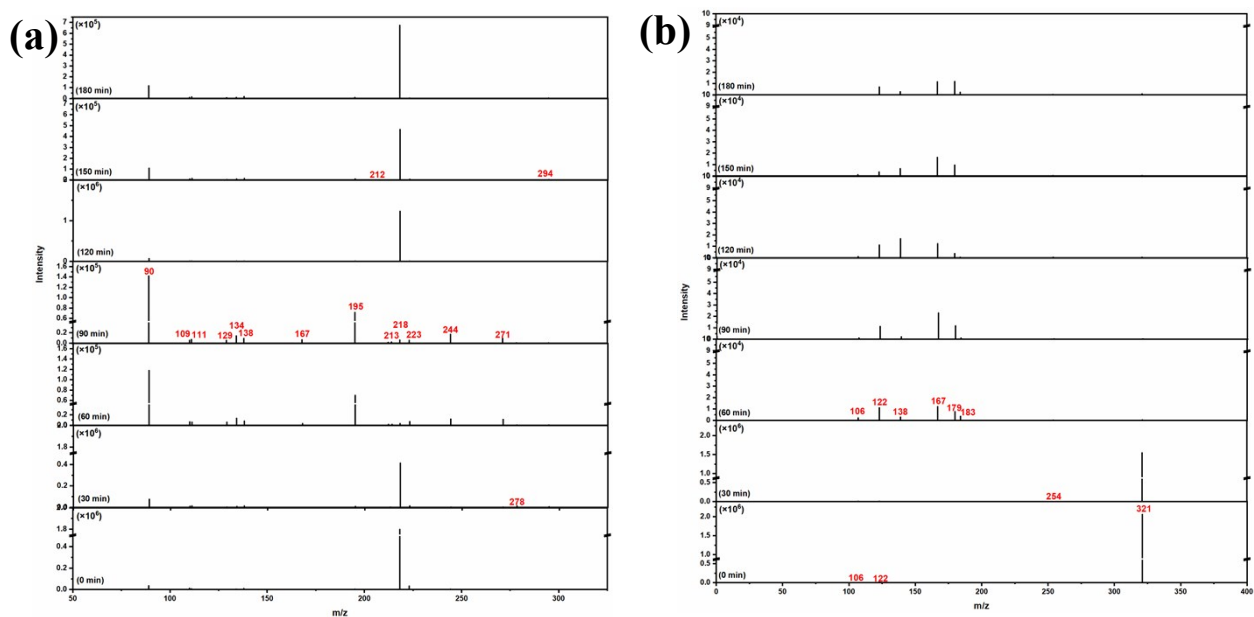

**Figure S2.** The mass spectra of the intermediates formed during the photodegradation of CPL in positive(a) and negative(b) ESI mode.

**Table S1** Characteristic ions of CPL and its photocatalytic degradation intermediates detected by LCMS-IT-TOF at different reaction time

| Code | Molecular formula                                                             | m/z                               |                                   |
|------|-------------------------------------------------------------------------------|-----------------------------------|-----------------------------------|
|      |                                                                               | Positive ion([M+H] <sup>+</sup> ) | Negative ion([M-H] <sup>-</sup> ) |
| CPL  | C <sub>11</sub> H <sub>12</sub> Cl <sub>2</sub> N <sub>2</sub> O <sub>5</sub> | -                                 | 321                               |
| P1   | C <sub>11</sub> H <sub>18</sub> O <sub>6</sub> N <sub>2</sub>                 | 271                               | -                                 |
| P2   | C <sub>10</sub> H <sub>10</sub> O <sub>4</sub> N <sub>2</sub> Cl <sub>2</sub> | 294                               | -                                 |
| P3   | C <sub>10</sub> H <sub>10</sub> O <sub>4</sub> NCl                            | 244                               | -                                 |
| P4   | C <sub>7</sub> H <sub>5</sub> O <sub>4</sub> N                                | 167                               | -                                 |
| P5   | C <sub>2</sub> H <sub>3</sub> O <sub>3</sub> Cl                               | 111                               | -                                 |
| P6   | C <sub>7</sub> H <sub>6</sub> O <sub>3</sub>                                  | 138                               | -                                 |
| P7   | C <sub>2</sub> H <sub>2</sub> O <sub>2</sub> Cl <sub>2</sub>                  | 129                               | -                                 |
| P8   | C <sub>2</sub> H <sub>2</sub> O <sub>4</sub>                                  | 90                                | -                                 |
| P9   | C <sub>9</sub> H <sub>10</sub> O                                              | 134                               | -                                 |
| P10  | C <sub>11</sub> H <sub>13</sub> O <sub>3</sub> NCl <sub>2</sub>               | 278                               | -                                 |
| P11  | C <sub>11</sub> H <sub>13</sub> O <sub>4</sub> N                              | 223                               | -                                 |
| P12  | C <sub>9</sub> H <sub>9</sub> O <sub>4</sub> N                                | 195                               | -                                 |

---

|     |                      |     |     |
|-----|----------------------|-----|-----|
| P13 | $C_6H_4O_2$          | 109 | -   |
| P14 | $C_9H_{12}O_4N_2$    | 212 | -   |
| P15 | $C_9H_{11}O_5N$      | 213 | -   |
| P16 | $C_8H_8O_4$          | 167 | -   |
| P17 | $C_2H_3O_3N$         | 90  | -   |
| P18 | $C_5H_{10}O_4NCl_2$  | 218 | -   |
| P19 | $C_{11}H_{14}O_5N_2$ | -   | 254 |
| P20 | $C_8H_9O_4N$         | -   | 183 |
| P21 | $C_7H_6O_2$          | -   | 122 |
| P22 | $C_7H_6O$            | -   | 106 |
| P23 | $C_{11}H_{14}O_3NCl$ | -   | 242 |
| P24 | $C_6H_5O_3$          | -   | 138 |
| P25 | $C_9H_9O_3N$         | -   | 179 |

---
